# Supplementary material for: Low Iodine Intake May Decrease Women’s Fecundity: A Population-Based Cross-Sectional Study
Source: MDPI journal article supplement (doi:10.3390/nu13093056), 2021-08-31
Supplement: s1 [file s1]

**Table S1.** Demographic characteristics among the total of 6126 pregnant women, by whether they reported to have their plan for the current pregnancy

| <b>Variables</b>                       | <b>Non-planners (N=4175)</b> | <b>Planners (N=1951)</b> |
|----------------------------------------|------------------------------|--------------------------|
| <b>Iodine status</b>                   |                              |                          |
| Deficiency                             | 59.3                         | 57.5                     |
| Sufficiency                            | 40.7                         | 42.5                     |
| <b>Age (years)</b>                     |                              |                          |
| Age group (years)                      | 28.9±5.3                     | 29.6±4.8                 |
| < 30                                   | 56.3                         | 62.3                     |
| ≥ 30                                   | 43.7                         | 37.7                     |
| <b>Ethnic group</b>                    |                              |                          |
| Han                                    | 95.2                         | 96.2                     |
| Non-Han                                | 4.8                          | 3.8                      |
| <b>Prepregnancy BMI</b>                |                              |                          |
| ≤ 18.4                                 | 16.0                         | 15.3                     |
| 18.5–23.9                              | 66.5                         | 67.2                     |
| 24.0–27.9                              | 14.4                         | 13.2                     |
| ≥ 28.0                                 | 3.1                          | 4.3                      |
| <b>Education</b>                       |                              |                          |
| ≤ 9 years                              | 40.0                         | 30.4                     |
| 10–13 years                            | 23.8                         | 20.9                     |
| ≥14 years                              | 36.2                         | 48.7                     |
| <b>Income per capita (USD)</b>         |                              |                          |
| <10,000                                | 50.6                         | 42.6                     |
| 10,000 –15,999                         | 31.1                         | 31.5                     |
| ≥ 16,000                               | 18.3                         | 25.9                     |
| <b>Occupation</b>                      |                              |                          |
| Office workers                         | 42.4                         | 49.3                     |
| Domestic workers                       | 37.3                         | 36.0                     |
| Others                                 | 20.3                         | 14.7                     |
| <b>Primigravida</b>                    |                              |                          |
| Yes                                    | 28.9                         | 27.9                     |
| No                                     | 71.1                         | 72.1                     |
| <b>History of spontaneous abortion</b> |                              |                          |
| Yes                                    | 76.5                         | 77.4                     |
| No                                     | 23.5                         | 22.6                     |

**Table S2.** Iodine intake in population in pregnancy in Zhejiang between the coastal and inland regions, 2015–2017

| <b>Region</b> | <b>Year</b> | <b>N</b> | <b>Median UIC (95% CI), µg/L</b> | <b>Iodine status<sup>¶</sup></b> |
|---------------|-------------|----------|----------------------------------|----------------------------------|
| Coast         | 2015        | 3369     | 127.0 (122.4–130.0)              | Deficiency                       |
|               | 2016        | 3286     | 119.2 (116.6–123.1)              | Deficiency                       |
|               | 2017        | 3507     | 113.5 (110.0–116.4)              | Deficiency                       |
| Inland        | 2015        | 1952     | 152.5 (147.7–155.4)              | Sufficiency                      |
|               | 2016        | 2226     | 146.0 (140.5–152.0)              | Sufficiency                      |
|               | 2017        | 2469     | 154.0 (150.0–156.9)              | Sufficiency                      |

<sup>¶</sup>Iodine status in population in pregnancy was assessed based on the WHO criteria of optimal iodine of 150–249 µg/L.

**Table S3.** The association between potential covariates and fecundability ratios via univariate Cox regressions analyses

| Variable               | N    | Fecundability ratio (95% CI) | <i>p</i>  |
|------------------------|------|------------------------------|-----------|
| Iodine nutrition group |      |                              |           |
| Iodine sufficiency     | 695  | 1                            |           |
| Iodine deficiency      | 958  | 0.814 (0.718–0.923)          | 0.001*    |
| Age group              |      |                              |           |
| < 30 years             | 700  | 1                            |           |
| ≥ 30 years             | 953  | 0.725 (0.657–0.810)          | < 0.001** |
| Prepregnancy BMI       |      |                              |           |
| 18.5–23.9              | 1118 | 1                            |           |
| ≤ 18.4                 | 259  | 1.013 (0.839–1.224)          | 0.892     |
| ≥ 24.0                 | 276  | 0.846 (0.721–0.993)          | 0.040*    |
| Spontaneous abortion   |      |                              |           |
| No                     | 1587 | 1                            |           |
| Yes                    | 66   | 0.735 (0.558–0.968)          | 0.029*    |
| Primigravida           |      |                              |           |
| Yes                    | 464  | 1                            |           |
| No                     | 1189 | 1.095 (0.976–1.227)          | 0.1       |
| Ethnicity              |      |                              |           |
| Others                 | 66   | 1                            |           |
| Han group              | 1587 | 0.782 (0.605–1.011)          | 0.070     |
| Occupation             |      |                              |           |
| Office workers         | 811  | 1                            |           |
| Domestic workers       | 603  | 0.859 (0.745–0.990)          | 0.036*    |
| Others                 | 239  | 0.901 (0.745–1.089)          | 0.280     |
| Education (years)      |      |                              |           |
| ≤ 9                    | 811  | 1                            |           |
| 10–13                  | 603  | 1.076 (0.930–1.244)          | 0.324     |
| ≥14                    | 239  | 1.231(1.092–1.389)           | <0.001**  |
| Income (USD)           |      |                              |           |
| <10,000                | 709  | 1                            |           |
| 10,000–15,999          | 514  | 1.066 (0.921–1.233)          | 0.393     |
| ≥ 16,000               | 430  | 1.223 (1.040–1.438)          | 0.015*    |

\*  $p < 0.05$ ; \*\*  $p < 0.001$ .

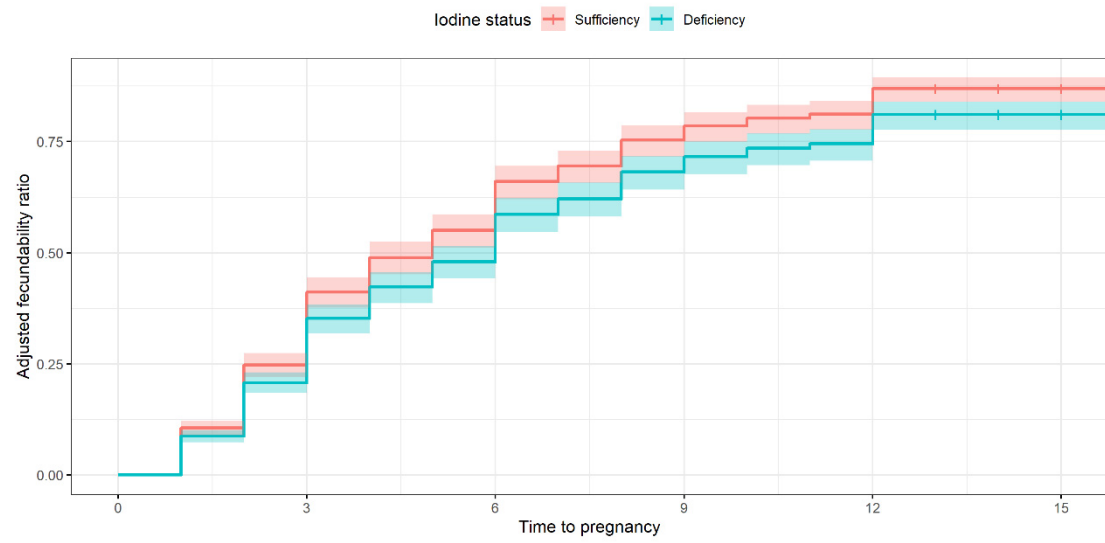

**Figure S1:** Cox regression analyses for iodine deficiency and adjusted fecundability ratios.
